# Supplementary material for: SIRT7 Deficiency Protects against Aging-Associated Glucose Intolerance and Extends Lifespan in Male Mice
Source: MDPI journal article supplement (doi:10.3390/cells11223609), 2022-11-15
Supplement: s1 [file s1]

**Supplementary Table S1: Primer sequences of mouse genes used for qRT-PCR.**

| <b>Symbol</b>   | <b>Forward</b>              | <b>Reverse</b>             |
|-----------------|-----------------------------|----------------------------|
| <i>Atf4</i>     | TCGATGCTCTGTTTCGAATG        | GGCAACCTGGTCGACTTTTA       |
| <i>Calr</i>     | GACTGGGATGAACGAGCCAA        | GGTTTCCACTCGCCCTTGTA       |
| <i>Canx</i>     | GGCTAGACGACGAACCTGAG        | AGGCTTCCATTTGCCCTTAT       |
| <i>Cdkn2a</i>   | CCAAGAGCGGGGACATCAAG        | AAGCTATGCCCCTCGGTCTG       |
| <i>Col3a1</i>   | TACACCTGCTCCTGTGCTTC        | CATTCTCCCACTCCAGACT        |
| <i>Col6a1</i>   | TGATGGCATTCAAGGACCCC        | TGGGCCAGCATTTCCTTCAT       |
| <i>Cxcl2</i>    | CCAGACAGAAATCATAGCCACTC     | CTTCCGTTGAGGGACAGCA        |
| <i>Cycs</i>     | GGAGGCAAGCATAAGACTGG        | TCCATCAGGGTATCCTCTCC       |
| <i>Ddit3</i>    | ATATCTCATCCCCAGGAAACG       | TCTTCCTTGCTCTTCCTCCTC      |
| <i>Ddost</i>    | CAGCGATGCCTTCTTCAACTC       | GCCTGTCTGAGAATACCTCTGC     |
| <i>Dio2</i>     | AGTCAAGAAGGTGGCATTCTG       | ACAGCTTCCTCCTAGATGCCT      |
| <i>Fbxo6</i>    | CCGTGTGCTGAAGAGAACC         | GTCTCCACCTTCCAGCGAT        |
| <i>Fgf21</i>    | GCCATTCACTTTGCCTGAGC        | ATCCATTCCATCAGGGCTGC       |
| <i>Hspa5</i>    | AGTGGTGGCCACTAATGGAG        | TCAATCCTTGCTTGATGCTG       |
| <i>Il1b</i>     | GGGCTGCTTCCAAACCTTTGACC     | GTAGCTGCCACAGCTTCTCCACAGCC |
| <i>Il4</i>      | CATGGGAAAACCTCCATGCTT       | ATGAATCCAGGCATCGAAAA       |
| <i>Il12a</i>    | TGGCTACTAGAGAGACTTCTTCCACAA | GCACAGGGTCATCATCAAAGAC     |
| <i>Lipe</i>     | GGCTCACAGTTACCATCTCACC      | GAGTACCTTGCTGTCTGTCC       |
| <i>Pdia3</i>    | TGTTGGAAGTACGACGACGAA       | GGCGAAGAACTCGACTAGCA       |
| <i>Pdia5</i>    | TATTCATTACCAGGACGGCG        | TCCTTCTCACTGTGATGTGC       |
| <i>Pdia6</i>    | TGGTTCCTTTCCTACCATCACT      | ACTTTCCTGCTGGAAAACCTGC     |
| <i>Pnpla2</i>   | TCCGAGAGATGTGCAAACAG        | CTCCAGCGGCAGAGTATAGG       |
| <i>Ppargc1a</i> | GAAATCCGAGCGGAGCTGAA        | GAATAGGGCTGCGTGCCATC       |
| <i>Ppib</i>     | AACCACAGTCAAGACCTCC         | TCCGTACCACATCCATGC         |
| <i>Sdf2l1</i>   | GCTATCCAACAACCAGGAGGTG      | GTTCAACAGTGACCGACAGG       |
| <i>Sirt7</i>    | TGCCAGGCACTTGGTTGTCT        | TAGGCTCCGCTTCGCTTAGG       |
| <i>Slc2a1</i>   | GCTTATGGGCTTCTCCAAACT       | GGTGACACCTCTCCACATAC       |
| <i>Slc2a4</i>   | ACCCCTCATTCCTCCCTGTGT       | ACCCCTCTGCAGACCCCTTC       |
| <i>Stt3a</i>    | GCAACCTGTCTGATGCTCGGAT      | ATGTGGACAGCACCTGGGAAAC     |
| <i>Tbp</i>      | CCCCTTGTAACCTTCACCAAT       | GAAGCTGCGGTACAATTCCAG      |
| <i>Tnf</i>      | AGAAAGCATGATCCGCGACGTG      | TGAGAGGGAGGCCATTTGGGAAC    |
| <i>Ucp1</i>     | GGCAACAAGAGCTGACAGTAAAT     | GGCCCTTGTAACAACAAAATAC     |
